# Supplementary material for: What Population Reveals about Individual Cell Identity: Single-Cell Parameter Estimation of Models of Gene Expression in Yeast
Source: PubMed Central journal article supplement (PMC4747589; doi:10.1371/journal.pcbi.1004706), 2016-02-09
Supplement: pcbi.1004706.s008.pdf [file pcbi.1004706.s008.pdf]

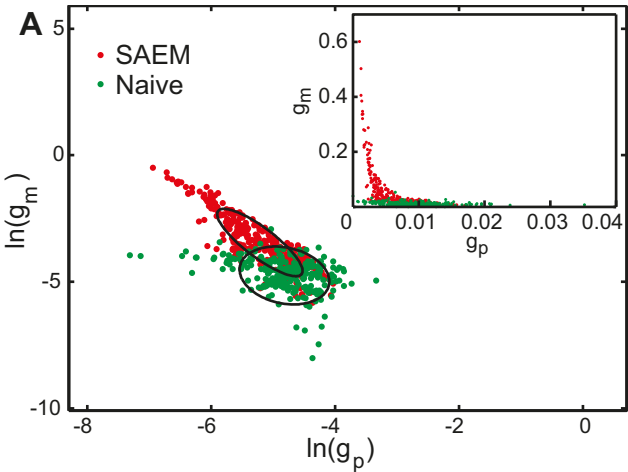

**B**

|       | Parameter distribution structure | Parameter distribution spread |
|-------|----------------------------------|-------------------------------|
| SAEM  | 0.62                             | 6.7                           |
| Naive | 0.19                             | 37                            |
