# Supplementary material for: What Population Reveals about Individual Cell Identity: Single-Cell Parameter Estimation of Models of Gene Expression in Yeast
Source: PubMed Central journal article supplement (PMC4747589; doi:10.1371/journal.pcbi.1004706), 2016-02-09

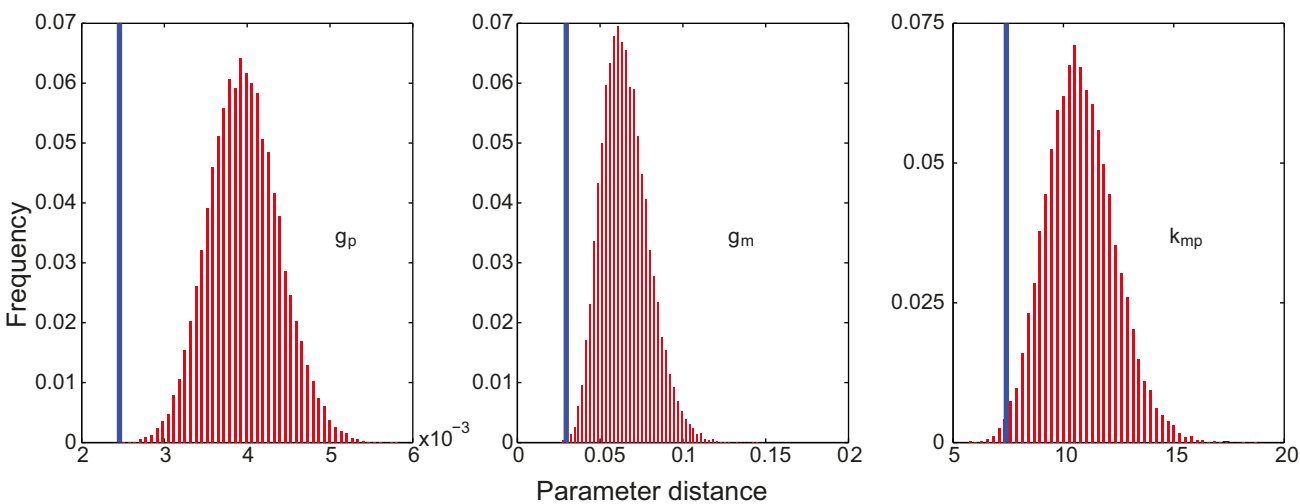

Supplement: pcbi.1004706.s009.pdf [file pcbi.1004706.s009.pdf]
