# Supplementary material for: What Population Reveals about Individual Cell Identity: Single-Cell Parameter Estimation of Models of Gene Expression in Yeast
Source: PubMed Central journal article supplement (PMC4747589; doi:10.1371/journal.pcbi.1004706), 2016-02-09
Supplement: pcbi.1004706.s010.pdf [file pcbi.1004706.s010.pdf]

**A**

| Parameter         | Inferred Values      |                      | Initials Values      | Units             | Parameter               | Inferred Values |             | Initials Values |
|-------------------|----------------------|----------------------|----------------------|-------------------|-------------------------|-----------------|-------------|-----------------|
|                   | Nat. Values          | Log. Values          | Log. Values          |                   |                         | Nat. Values     | Log. Values | Log. Values     |
| $E[k_m]$          | 5.47                 | 1.61                 | 1.49                 | $\text{min}^{-1}$ | $\text{Corr}(k_m g_m)$  | 0.128           | 0.167       | NA              |
| $E[g_m]$          | $1.38 \cdot 10^{-2}$ | -4.75                | -4.74                | $\text{min}^{-1}$ | $\text{Corr}(k_m k_p)$  | -0.172          | -0.196      | NA              |
| $E[k_p]$          | 1.23                 | $7.81 \cdot 10^{-2}$ | $5.66 \cdot 10^{-2}$ | $\text{min}^{-1}$ | $\text{Corr}(k_m g_p)$  | 0.297           | 0.328       | NA              |
| $E[g_p]$          | $9.76 \cdot 10^{-3}$ | -4.82                | -4.81                | $\text{min}^{-1}$ | $\text{Corr}(k_m \tau)$ | 0               | 0           | NA              |
| $E[\tau]$         | 23.4                 | 3.15                 | 3.15                 | min               | $\text{Corr}(g_m k_p)$  | 0.342           | 0.424       | NA              |
| $\text{SD}[k_m]$  | 2.41                 | 0.421                | NA                   | $\text{min}^{-1}$ | $\text{Corr}(g_m g_p)$  | -0.136          | -0.205      | NA              |
| $\text{SD}[g_m]$  | $1.73 \cdot 10^{-2}$ | 0.971                | NA                   | $\text{min}^{-1}$ | $\text{Corr}(g_m \tau)$ | 0               | 0           | NA              |
| $\text{SD}[k_p]$  | 0.667                | 0.508                | NA                   | $\text{min}^{-1}$ | $\text{Corr}(k_p g_p)$  | 0.216           | 0.244       | NA              |
| $\text{SD}[g_p]$  | $6.60 \cdot 10^{-3}$ | 0.614                | NA                   | $\text{min}^{-1}$ | $\text{Corr}(k_p \tau)$ | 0               | 0           | NA              |
| $\text{SD}[\tau]$ | 0                    | 0                    | NA                   | min               | $\text{Corr}(g_p \tau)$ | 0               | 0           | NA              |
| $\varepsilon_a$   | 45.3                 | 3.81                 | 3.62                 | AU                |                         |                 |             |                 |
| $\varepsilon_b$   | $9.13 \cdot 10^{-2}$ | -2.39                | -1.51                | -                 |                         |                 |             |                 |

**B**

| Parameter         | Inferred Values      |                       | Initials Values       | Units             | Parameter               | Inferred Values |             | Initials Values |
|-------------------|----------------------|-----------------------|-----------------------|-------------------|-------------------------|-----------------|-------------|-----------------|
|                   | Nat. Values          | Log. Values           | Log. Values           |                   |                         | Nat. Values     | Log. Values | Log. Values     |
| $E[k_m]$          | 14.7                 | 2.63                  | 2.30                  | $\text{min}^{-1}$ | $\text{Corr}(k_m g_m)$  | 0.320           | 0.432       | 0               |
| $E[g_m]$          | $6.00 \cdot 10^{-2}$ | -3.45                 | -1.22                 | $\text{min}^{-1}$ | $\text{Corr}(k_m k_p)$  | -0.0647         | -0.0753     | 0               |
| $E[k_p]$          | 1.19                 | $-5.45 \cdot 10^{-2}$ | $-5.45 \cdot 10^{-2}$ | $\text{min}^{-1}$ | $\text{Corr}(k_m g_p)$  | -0.324          | -0.376      | 0               |
| $E[g_p]$          | $6.45 \cdot 10^{-3}$ | -5.22                 | -5.52                 | $\text{min}^{-1}$ | $\text{Corr}(k_m \tau)$ | 0               | 0           | 0               |
| $E[\tau]$         | 37.0                 | 3.61                  | 3.40                  | min               | $\text{Corr}(g_m k_p)$  | 0.627           | 0.746       | 0               |
| $\text{SD}[k_m]$  | 4.80                 | 0.319                 | 0.330                 | $\text{min}^{-1}$ | $\text{Corr}(g_m g_p)$  | -0.416          | -0.843      | 0               |
| $\text{SD}[g_m]$  | $9.66 \cdot 10^{-2}$ | 1.13                  | 0.330                 | $\text{min}^{-1}$ | $\text{Corr}(g_m \tau)$ | 0               | 0           | 0               |
| $\text{SD}[k_p]$  | 0.902                | 0.674                 | 0.330                 | $\text{min}^{-1}$ | $\text{Corr}(k_p g_p)$  | -0.289          | -0.382      | 0               |
| $\text{SD}[g_p]$  | $4.12 \cdot 10^{-3}$ | 0.585                 | 0.330                 | $\text{min}^{-1}$ | $\text{Corr}(k_p \tau)$ | 0               | 0           | 0               |
| $\text{SD}[\tau]$ | 0                    | 0                     | 0                     | min               | $\text{Corr}(g_p \tau)$ | 0               | 0           | 0               |
| $\varepsilon_a$   | 63.9                 | 4.16                  | 5.99                  | AU                |                         |                 |             |                 |
| $\varepsilon_b$   | $8.67 \cdot 10^{-2}$ | -2.45                 | -1.20                 | -                 |                         |                 |             |                 |

**C**

| Parameter         | Inferred Values      |                       | Initials Values       | Units             | Parameter               | Inferred Values       |                       | Initials Values |
|-------------------|----------------------|-----------------------|-----------------------|-------------------|-------------------------|-----------------------|-----------------------|-----------------|
|                   | Nat. Values          | Log. Values           | Log. Values           |                   |                         | Nat. Values           | Log. Values           | Log. Values     |
| $E[k_m]$          | 9.33                 | 2.10                  | 2.30                  | $\text{min}^{-1}$ | $\text{Corr}(k_m g_m)$  | 0.604                 | 0.733                 | 0               |
| $E[g_m]$          | $4.17 \cdot 10^{-2}$ | -3.80                 | -1.22                 | $\text{min}^{-1}$ | $\text{Corr}(k_m k_p)$  | 0.329                 | 0.359                 | 0               |
| $E[k_p]$          | 1.08                 | $-5.45 \cdot 10^{-2}$ | $-5.45 \cdot 10^{-2}$ | $\text{min}^{-1}$ | $\text{Corr}(k_m g_p)$  | $2.52 \cdot 10^{-2}$  | $2.99 \cdot 10^{-2}$  | 0               |
| $E[g_p]$          | $4.36 \cdot 10^{-3}$ | -5.65                 | -5.52                 | $\text{min}^{-1}$ | $\text{Corr}(k_m \tau)$ | 0                     | 0                     | 0               |
| $E[\tau]$         | 50.4                 | 3.92                  | 3.40                  | min               | $\text{Corr}(g_m k_p)$  | 0.578                 | 0.706                 | 0               |
| $\text{SD}[k_m]$  | 5.08                 | 0.509                 | 0.330                 | $\text{min}^{-1}$ | $\text{Corr}(g_m g_p)$  | -0.247                | -0.458                | 0               |
| $\text{SD}[g_m]$  | $6.57 \cdot 10^{-2}$ | 1.12                  | 0.330                 | $\text{min}^{-1}$ | $\text{Corr}(g_m \tau)$ | 0                     | 0                     | 0               |
| $\text{SD}[k_p]$  | 0.605                | 0.521                 | 0.330                 | $\text{min}^{-1}$ | $\text{Corr}(k_p g_p)$  | $-4.05 \cdot 10^{-2}$ | $-4.88 \cdot 10^{-2}$ | 0               |
| $\text{SD}[g_p]$  | $3.17 \cdot 10^{-2}$ | 0.652                 | 0.330                 | $\text{min}^{-1}$ | $\text{Corr}(k_p \tau)$ | 0                     | 0                     | 0               |
| $\text{SD}[\tau]$ | 0                    | 0                     | 0                     | min               | $\text{Corr}(g_p \tau)$ | 0                     | 0                     | 0               |
| $\varepsilon_a$   | 68.6                 | 4.23                  | 5.99                  | AU                |                         |                       |                       |                 |
| $\varepsilon_b$   | $6.42 \cdot 10^{-2}$ | -2.75                 | -1.20                 | -                 |                         |                       |                       |                 |
