# Supplementary material for: What Population Reveals about Individual Cell Identity: Single-Cell Parameter Estimation of Models of Gene Expression in Yeast
Source: PLoS Comput Biol. 2016 Feb 9;12(2):e1004706. doi: 10.1371/journal.pcbi.1004706 (PMC4747589; doi:10.1371/journal.pcbi.1004706)
Supplement: S4 Text — Parameters km and kp cannot be assigned values unambiguously no matter the quality and quantity of fluorescence measurements. (PDF) [file pcbi.1004706.s004.pdf]

## Text S4. Identifiability analysis

We show here that parameters  $k_m$  and  $k_p$  cannot be assigned values unambiguously no matter the quality and quantity of fluorescence measurements. Since the gene expression model giving mRNA ( $m$ ) and protein ( $p$ ) levels as a function of time is a linear dynamical system, and the cell fluorescence  $f$  is assumed to be simply a rescaled and delayed version of  $p$ , we can easily verify this by looking at the transfer function of the system (1). This is given by

$$F(s) = e^{-\tau(g_p+s)}P(s),$$

$$P(s) = \frac{k_m k_p}{(s + g_m)(s + g_p)}U(s) + \frac{k_p}{(s + g_m)(s + g_p)}m(0) + \frac{1}{s + g_p}p(0),$$

where  $U(s)$ ,  $P(s)$  and  $F(s)$  are the Laplace transforms of  $u(t)$ ,  $p(t)$  and  $f(t)$ , in the same order. For any fixed input  $U(s)$ , since  $m(0) = p(0) = 0$ , it is apparent that  $F(s)$  depends on  $k_m$  and  $k_p$  only via their product. That is, all models with the same values of  $g_m$ ,  $g_p$  and  $k_m \cdot k_p$  will respond identically to the same input no matter the specific values of  $k_m$  and  $k_p$ . A similar issue would arise if  $m(0)$  was different from zero but unknown. In this case, the term depending on  $k_p$  only would actually depend on the product  $k_p m(0)$ , with both factors unknown. This issue is commonly referred to as “structural non-identifiability” (of  $k_m$  and  $k_p$ ).

Structural non-identifiability of  $k_m$  and  $k_p$  generally results in issues in the identification of their population statistics as well. In order to ensure a well-posed mixed-effects identification problem, all identification results reported in this work were obtained with the mean of  $k_p$  fixed to a default value. We stress the fact that, although related, single-cell model (non-)identifiability should not be confused with the (non-)identifiability of the parameter statistics in the mixed-effects approach. To what extent, if at all, identifiability of the statistics of non-identifiable single-cell parameters is ameliorated by a population approach (e.g. through their correlation with yet other parameters) is not obvious. While a full theoretical investigation of this issue would go beyond the scope of this paper, this point is illustrated on a simple example, analogous to our case study, in Text S5.

When using Mixed Effects models and SAEM, controlling shrinkage is also useful in order to detect potential identifiability-related issues. We speak of shrinkage when the empirical distribution of single-cell parameters (as estimated by MAP or maximum likelihood) is narrower than the population distribution. Obtaining shrinkage is indeed reminiscent of having single-cell parameters ill-defined (having a flat likelihood). In such a case, single-cell parameter estimates given by MAP will mostly represent the mode of the prior (i.e. the population distribution), resulting in a narrow distribution of single-cell parameter values (2). Subsequently to our non-identifiability analysis, we found that no substantial shrinkage was present. Indeed, computing the  $\eta$ -shrinkage as in (2) yielded 12%, 0% and 4% for parameters  $k_{mp}$ ,  $g_p$  and  $g_m$  on  $\mathcal{D}^I$ , and 6%, 4% and 4% on  $\mathcal{D}^V$ , respectively.

## Bibliography

1. Oppenheim AV., Willsky AS, Nawab SH (1996) Signals and Systems. Prentice Hall
2. Savic RM, Karlsson MO (2009) Importance of shrinkage in empirical Bayes estimates for diagnostics: problems and solutions. AAPS Journal, 11(3):558–569
